# Supplementary material for: The nature of electronic excitations at the metal–bioorganic interface illustrated on histidine–silver hybrids
Source: Royal Society of Chemistry journal article supplement (doi:10.1039/c3cp52712c), 2013-12-02

## **Supporting Information**

**For**

### **Electronic Excitations at the Metal-Bioorganic interface illustrated on Histidine-Silver Hybrids**

Željka Sanader,<sup>a</sup> Roland Mitrić\*<sup>b</sup>, Vlasta Bonačić-Koutecký\*<sup>a,c</sup>, Bruno Bellina,<sup>d,e</sup> Rodolphe Antoine<sup>d,e</sup> and Philippe Dugourd\*<sup>d,e</sup>

Fig. S1. UVPD Spectra at 270 nm of [His+Ag]<sup>+</sup>, [His+Ag<sub>3</sub>]<sup>+</sup>, [His+3Ag-2H]<sup>-</sup> and [His+Ag-2H]<sup>-</sup>

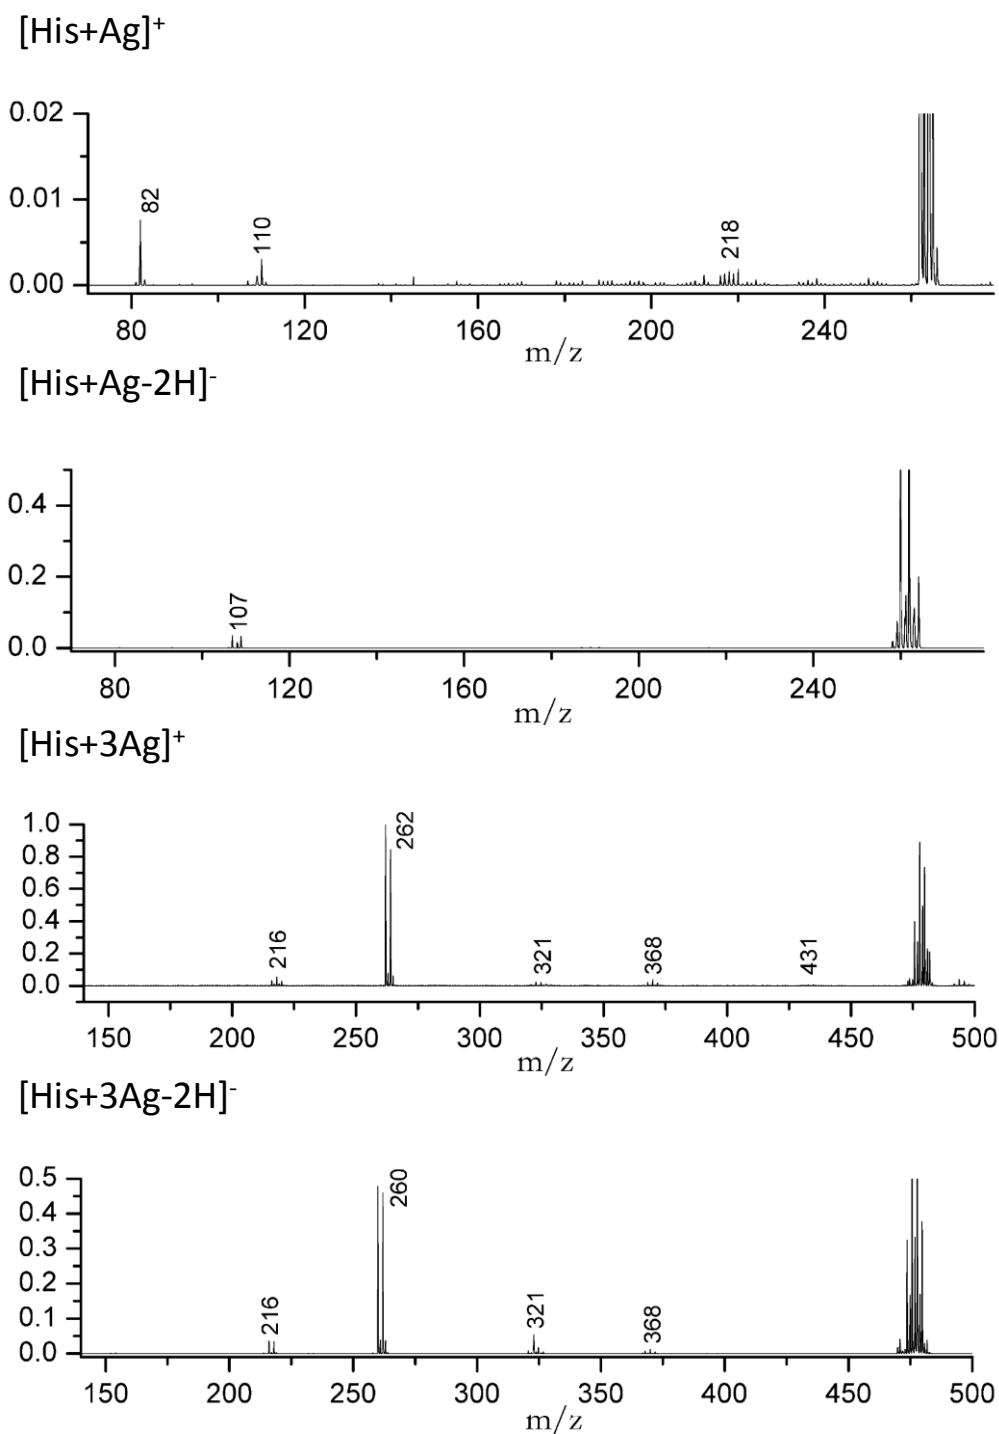

Fig S2. Isomers for [His+H]<sup>+</sup>

[Histidine+H]<sup>+</sup>

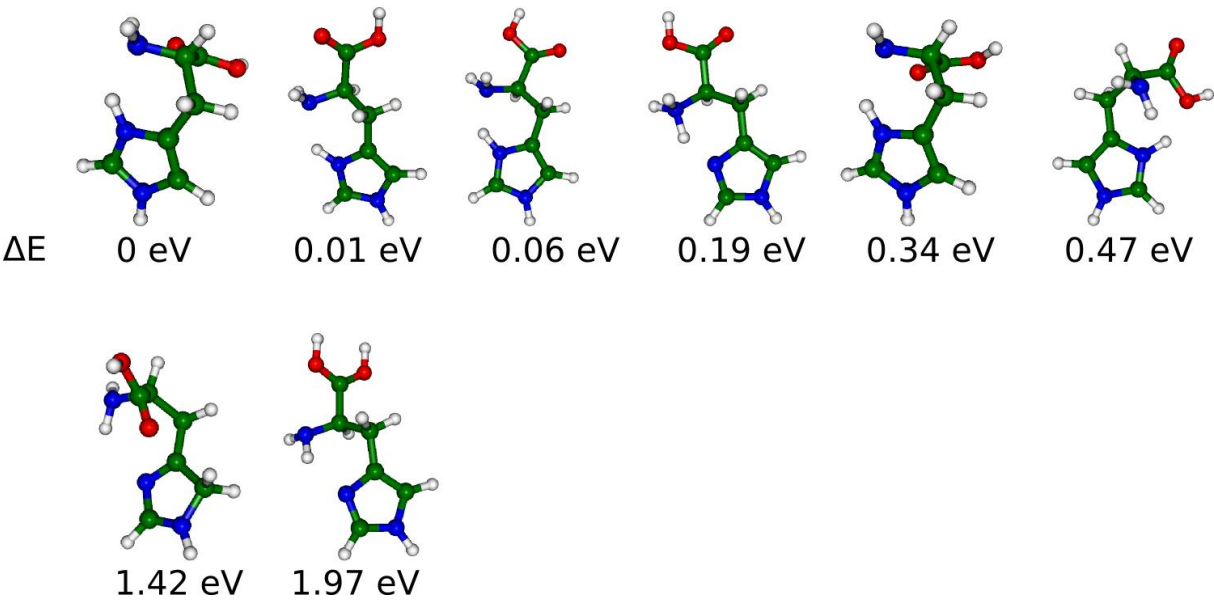

Fig S3. Isomers for  $[\text{His}+\text{Ag}]^+$  and  $[\text{His}+\text{Ag}-2\text{H}]^-$

$[\text{Histidine}+\text{Ag}]^+$

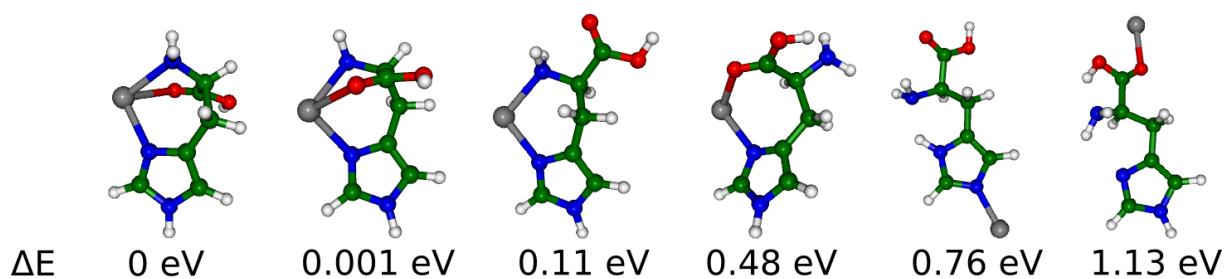

$[\text{Histidine}+\text{Ag}-2\text{H}]^-$

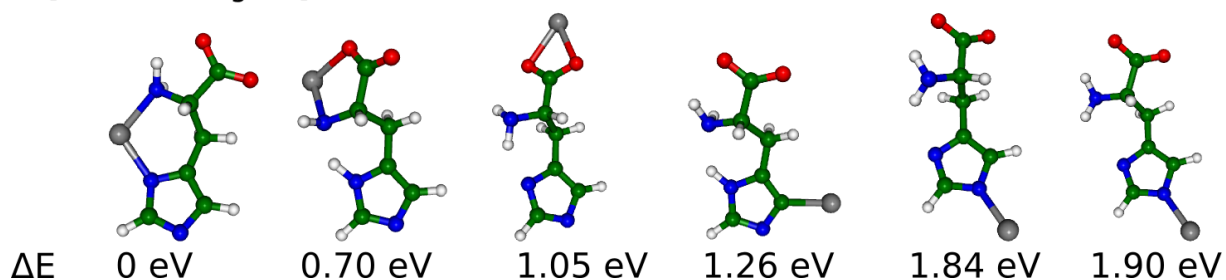

Fig S4. Isomers for  $[\text{His}+\text{Ag}_3]^+$  and  $[\text{His}+\text{Ag}_3-2\text{H}]^-$

$[\text{Histidine}+\text{Ag}_3]^+$

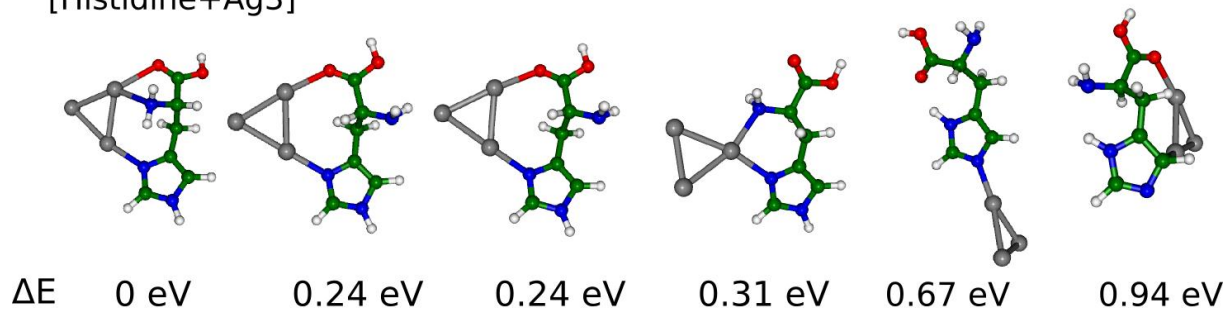

$[\text{Histidine}+\text{Ag}_3-2\text{H}]^-$

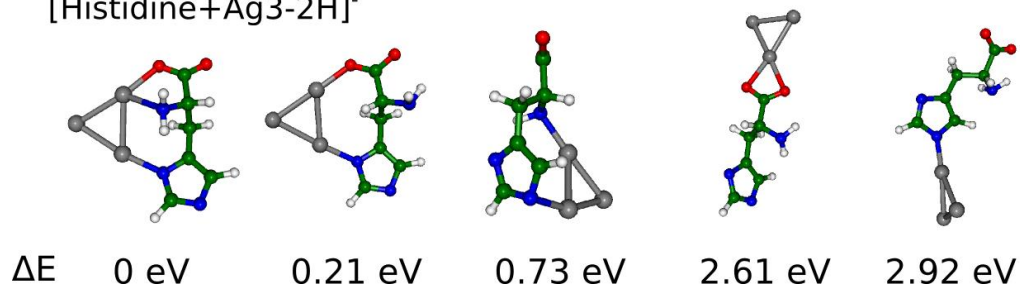

Supplement: c3cp52712c.pdf [file c3cp52712c.pdf]
